# Supplementary material
Source: PubMed Central journal article supplement (PMC5850641)

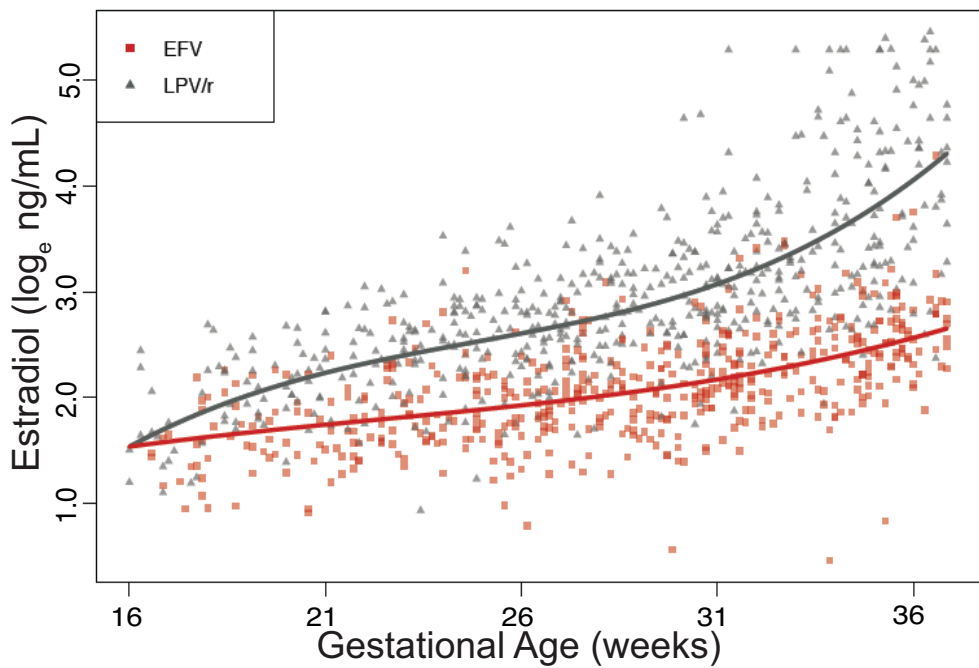

Supplement: cix772_suppl_supplementary_figure_s1.pdf [file cix772_suppl_supplementary_figure_s1.pdf]
